# Supplementary material for: Prostaglandin E2 Exerts Multiple Regulatory Actions on Human Obese Adipose Tissue Remodeling, Inflammation, Adaptive Thermogenesis and Lipolysis
Source: PubMed Central journal article supplement (PMC4849638; doi:10.1371/journal.pone.0153751), 2016-04-28

**S1 Fig:** Fold decrease changes with respect to vehicle of genes regulating the inflammatory response in human pre-adipocytes exposed to PGE<sub>2</sub> (1 μM, 3 h).

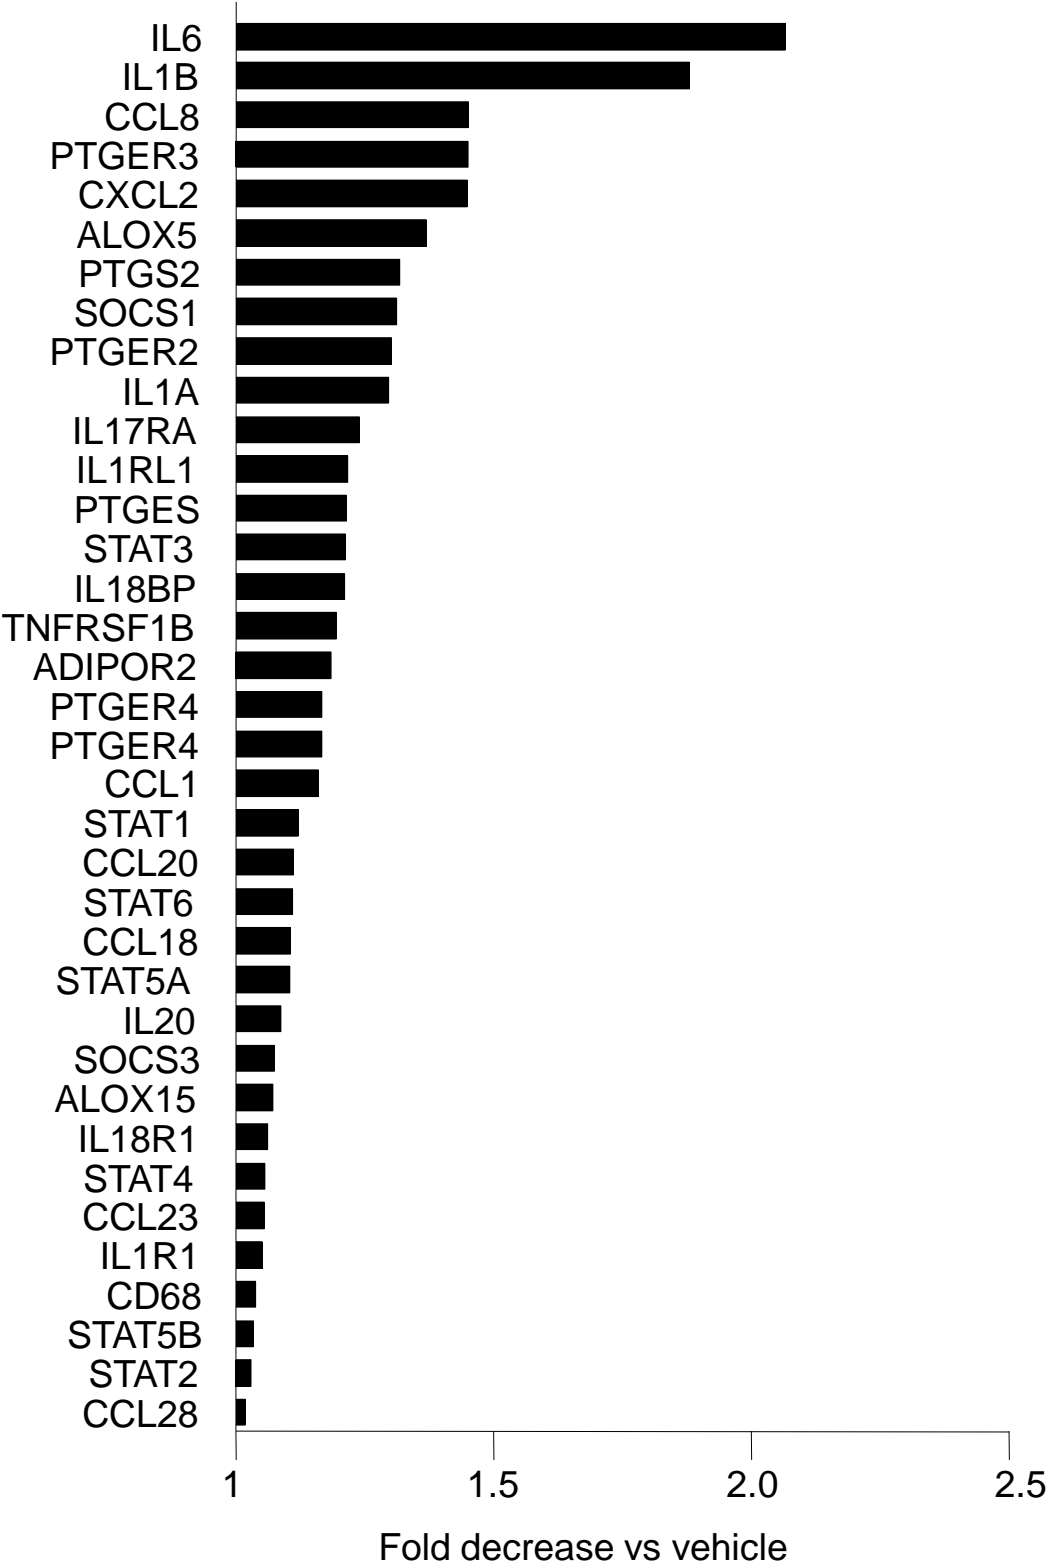

Supplement: pone.0153751.s001.pdf [file pone.0153751.s001.pdf]
